# Supplementary material for: Single Administration of Ultra-Low-Dose Lipopolysaccharide in Rat Early Pregnancy Induces TLR4 Activation in the Placenta Contributing to Preeclampsia
Source: PubMed Central journal article supplement (PMC4390151; doi:10.1371/journal.pone.0124001), 2015-04-08
Supplement: pone.0124001.s001.pdf [file pone.0124001.s001.pdf]

1 **Supporting Information**2 **S1 Table. Oligonucleotide primer sequences for qRT-PCR.**

| <b>Gene</b>       | <b>Forward primer (5'→3')</b> | <b>Reverse primer (5'→3')</b> |
|-------------------|-------------------------------|-------------------------------|
| <b>Rat gene</b>   |                               |                               |
| TNF- $\alpha$     | CGTCGTAGCAAACCACCAAG          | CACAGAGCAATGACTCCAAAG         |
| IL-6              | GCCCTTCAGGAACAGCTATG          | CAGAATTGCCATTGCACAAC          |
| MCP-1             | TTCACAGTTGCTGCCTGTAG          | TCTGATCTCACTTGGTTCTGG         |
| GAPDH             | ATGGGAAGCTGGTCATCAAC          | GGATGCAGGGATGATGTTCT          |
| <b>Human gene</b> |                               |                               |
| IL-6              | TACCCCCAGGAGAAGATTCC          | TTTTCTGCCAGTGCCTCTTT          |
| MCP-1             | CCCCAGTCACCTGCTGTTAT          | AGATCTCCTTGGCCACAATG          |
| GAPDH             | AACGGATTTGGTCGTATTG           | GGAAGATGGTGGTGGGATT           |
